# 1 Decay and damage of therapeutic phage OMKO1 by environmental 2 stressors

3 Michael Blazanin<sup>1,⊗,\*</sup>, Wai Tin Lam<sup>1,⊗</sup>, Emma Vasen<sup>1</sup>, Benjamin K. Chan<sup>1</sup>, and Paul E. Turner<sup>1,2</sup>

4 <sup>1</sup>Department of Ecology and Evolutionary Biology, Yale University, New Haven, CT 06511, USA.

5 <sup>2</sup>Program in Microbiology, Yale School of Medicine, New Haven, CT 06520, USA.

6

7 <sup>⊗</sup>These authors contributed equally to the work, and are listed in alphabetical order.

8 \*Correspondence to: Mike Blazanin, Department of Ecology and Evolutionary Biology, Yale University,  
9 165 Prospect St, New Haven, CT, 06520, USA; mike.blazanin@yale.edu

10

11 Keywords: bacteriophage, thermotolerance, virus

12 Short title: Tolerance of OMKO1 to environmental stress

13

## 14 **Abstract**

15 Antibiotic resistant bacterial pathogens are increasingly prevalent, driving the need for alternative  
16 approaches to chemical antibiotics when treating infections. One such approach is bacteriophage  
17 therapy: the use of bacteria-specific viruses that lyse (kill) their host cells. Just as the effect of  
18 environmental conditions (e.g. elevated temperature) on antibiotic efficacy is well-studied, the effect of  
19 environmental stressors on the potency of phage therapy candidates demands examination.  
20 Therapeutic phage OMKO1 infects and kills the opportunistic human pathogen *Pseudomonas*  
21 *aeruginosa*. Here, we used phage OMKO1 as a model to test how different environments affect the  
22 decay rate of a therapeutic virus, and whether exposure to an environmental stressor can damage  
23 surviving viral particles. We assessed the effects of elevated temperatures, saline concentrations, and  
24 urea concentrations. We observed that OMKO1 particles were highly tolerant to different saline  
25 concentrations, but decayed more rapidly at elevated temperatures and under high concentrations of  
26 urea. Additionally, we found that exposure to elevated temperature reduced the ability of surviving  
27 phage particles to suppress the growth of *P. aeruginosa*, suggesting a temperature-induced damage.  
28 Our findings demonstrate that OMKO1 is highly tolerant to a range of conditions that could be  
29 experienced inside and outside the human body, while also showing the need for careful  
30 characterization of therapeutic phages to ensure that environmental exposure does not compromise  
31 their expected potency, dosing, and pharmacokinetics.

## 32 Introduction

33 Widespread use of antibiotics – particularly in human therapy and animal agriculture – has selected for  
34 the evolution of multi-drug resistant bacterial pathogens, commonly associated with poorer prognosis  
35 and higher morbidity in human infections [1, 2]. One alternative or complementary approach to treating  
36 bacterial infections with chemical antibiotics is bacteriophage therapy [3], where bacteria-specific  
37 viruses with lytic replication cycles are used to kill (lyse) target bacterial cells. With any therapeutic  
38 treatment, understanding the effect of environmental conditions on efficacy is paramount. The effects  
39 of conditions like high temperature on the stability and application of chemical antibiotics is classically  
40 shown [4-7]. In parallel, during development of phage therapy it is important to measure the effects of  
41 various environmental conditions on the stability and subsequent reproduction on host cells of  
42 candidate therapeutic phages. Here, we use a therapeutic phage for a common human pathogen as a  
43 model of phage stability under a range of environmental conditions.

44 The need for novel approaches to treat bacterial pathogens varies greatly between infections: some  
45 strains of bacterial pathogens remain treatable with conventional antibiotics, while others show  
46 resistance across multiple drug classes, sometimes to all currently-approved antibiotics [8]. One of these  
47 multi-drug resistant bacterial pathogens is *Pseudomonas aeruginosa*, which has been identified by the  
48 World Health Organization as a high-priority threat to human health [9]. *P. aeruginosa* is a widespread  
49 gram-negative opportunistic pathogen that is commonly found in both natural habitats (e.g., soil, fresh  
50 water) and artificial environments (e.g., sewage, households, hospitals, and contaminated medical  
51 equipment) [10-13]. For these reasons, *P. aeruginosa* is frequently encountered by humans and causes  
52 urinary-tract and respiratory infections in immunocompromised individuals, as well as fouling surgically-  
53 implanted materials and devices [14, 15]. Individuals with cystic fibrosis (CF), non-CF bronchiectasis, and  
54 chronic-obstructive pulmonary disease (COPD) are especially vulnerable to lung infections caused by *P.*  
55 *aeruginosa*. Treatment of *P. aeruginosa* with chemical antibiotics is often ineffective, both because the  
56 bacteria readily form biofilms that limit the penetrance of antibiotic molecules, and due to multi-drug  
57 efflux (Mex) systems: protein complexes that actively remove various types of antibiotics from the cell  
58 [16-18].

59 As an alternative or complementary approach to treating *P. aeruginosa*, phage therapy has many  
60 attractive advantages, such as the ability for the phage ‘drug’ to self-amplify within the infection site.  
61 However, phage therapy also has some disadvantages, most notably the rapid evolution of bacterial  
62 resistance to lytic phage infection [19]. We previously described a naturally-occurring phage that  
63 leverages this inevitability of phage-resistance evolution as a strength. The dsDNA phage OMKO1 (virus  
64 family Myoviridae) attacks *P. aeruginosa*, while affecting the ability for the target bacteria to maintain  
65 resistance to various antibiotics [20, 21]. When bacterial strains evolve resistance to phage OMKO1, the  
66 mutants can show drug re-sensitivity, suggesting compromised ability for mechanisms such as MexAB  
67 and MexXY efflux pumps to remove antibiotics from the cell. Thus, phage OMKO1 can be doubly  
68 effective – the virus kills phage-susceptible bacterial cells, and also can drive evolution of phage  
69 resistance-associated loss of antibiotic resistance. This ‘evolutionary tradeoff’ is a mechanistic example  
70 of how phages can synergistically interact with chemical antibiotics, to beneficially extend the usefulness  
71 of currently-approved drugs. For example, phage OMKO1 and ceftazidime were used successfully in

72 emergency treatment of a 76-year-old patient, to resolve a chronic multi-drug resistant *P. aeruginosa*  
73 mediastinal and aortic graft infection [22]. We are also currently testing phage OMKO1 in a clinical trial  
74 to resolve or reduce *P. aeruginosa* infections in the lungs of CF, non-CF bronchiectasis and COPD  
75 patients when administered via aerosol-delivery (nebulizer) treatment (“CYPHY”, NCT04684641).

76 While phage OMKO1 already has been used successfully for patient treatment, its stability across  
77 environmental conditions remains uncharacterized. Phages for therapeutic use can be manufactured in  
78 large volumes then stored, and treatment can be administered through various routes, including  
79 intravenous, oral suspension, nebulizer, and direct injection to the site of infection. However, it is well-  
80 known that virus particles can degrade over time (i.e., become inactivated for cellular infection), and  
81 that the rate of degradation can depend on the degree of environmental stress, including elevated  
82 temperature, and exposure to high concentrations of salt and urea [23-31]. Because degradation alters  
83 the concentration of active virus particles, it can create inaccuracies for treatment dosing and  
84 administration. In addition, depending on the sensitivity of phage particles to conditions present in the  
85 human body, environmentally-induced degradation could also play a role in the pharmacokinetics  
86 during treatment. Moreover, environmental conditions could have effects beyond degradation,  
87 potentially altering the growth and infectivity of viral particles which are still intact. Thus, it is vital to  
88 test how exposure to environmental stressors affects both the titer and activity of phage-therapy  
89 candidates. Here, we use phage OMKO1 as a general model to test the adverse biological effects of  
90 three environmental stressors (salt, urea, and heat) – within and beyond the conditions experienced in  
91 the human body – on the stability and subsequent infectivity of a virus successfully used in phage  
92 therapy.

93

## 94 **Materials and Methods**

### 95 Strains

96 *P. aeruginosa* strain PAO1 was provided by B. Kazmierczak (Yale School of Medicine) and cultured on  
97 1.5% agar plates and liquid media made from Lysogeny Broth (LB: 10 g/L tryptone, 10 g/L NaCl, 5 g/L  
98 yeast extract). Bacteria were incubated at 37°C, and overnight batch cultures were grown with shaking  
99 (100 rpm) in 10mL broth, by inoculating with a single randomly-chosen colony. Bacterial stocks were  
100 stored in 40% glycerol at -80°C.

101 Phage OMKO1 was originally isolated from an aquatic sample (Dodge Pond, East Lyme, CT) enriched on  
102 PAO1 [20]. High-titer stocks (lysates) of the phage were obtained by mixing 10µl of the original stock  
103 with 10ml of PAO1 culture in exponential phase. After 12 hours to allow phage population growth, the  
104 mixture was centrifuged and filtered (0.22µm) to remove bacteria to obtain a cell free lysate. Phage  
105 lysates were stored at 4°C. Eight biological replicate OMKO1 stocks (S3, S8, S11, S16, R3, CV1, EV1, EV2)  
106 used in some experiments were generated by adding 10µl of the original stock into 5 independent 10ml  
107 PAO1 cultures in exponential phase. For simplicity, these were labeled stocks A, B, C, D, E, F, G, and H  
108 respectively.

### 109 Measuring Bacterial and Phage Densities

110 The density of a bacterial suspension was estimated using measurements of optical density at 600nm  
111 (OD600), based on a pre-generated standard curve for conversions between OD600 and colony forming  
112 units (CFU) per mL in a bacterial culture.

113 Estimates of phage titers were obtained via classic plaque-assay methods [32]. Lysate samples were  
114 serially diluted in LB, and 100  $\mu$ L of phage dilution were mixed with 100  $\mu$ L overnight PAO1 culture and  
115 added to 4 mL 'soft' (0.75%) agar LB held at 50°C. After gentle vortexing, the mixture was immediately  
116 spread onto a 1.5% agar LB plate. When solidified, plates were inverted and incubated overnight at  
117 37°C. Plates with countable plaques were used to calculate the number of plaque-forming-units (PFUs)  
118 per mL in the lysate.

#### 119 Heat stress survival

120 To measure effects of heat on phage stability, we exposed samples of phage OMKO1 to temperatures  
121 ranging from 55°C to 80°C for 5, 30, 60, or 90 minutes (Fig 1A), or 70 °C for 5, 90, 180, 270, or 360  
122 minutes (Fig 1B). For each temperature-duration treatment 100  $\mu$ L of an OMKO1 phage stock (stock A-E;  
123 for Fig 1A, only Stock A) stored in LB media was split evenly into two replicate 250  $\mu$ L Eppendorf tubes  
124 and placed in a pre-heated MyCycler PCR block (BioRad Laboratories, Inc., Hercules, CA) with an  
125 established temperature gradient (30-80°C, at 5°C intervals). Tubes were removed from the heat block  
126 after specified times, and immediately cooled on ice to halt the stressful condition. The two replicate  
127 tubes were mixed together, and then titered in triplicate to measure phage densities. Percent survival  
128 was calculated relative to the density measured in the 55°C treatment after 5 minutes (Fig 1A), or  
129 relative to the source stock density (Fig 1B). We then fit a generalized linear model and carried out an  
130 ANCOVA. For Fig 1A, the model was of  $\log_{10}(\text{percent survival})$  as a function of temperature (as a factor)  
131 and the interaction between temperature and duration; for Fig 1B, of  $\log_{10}(\text{percent survival})$  as a  
132 function of phage stock and the interaction of phage stock and duration. Values below the limit of  
133 detection were excluded from statistical analyses.

#### 134 Measuring phage fitness by bacterial growth curves

135 To measure phage fitness post heat stress, phages were subjected to heat stress as described above  
136 then titered. These samples were then normalized by concentration to combine a defined number of  
137 post-stress PFUs with bacteria in a 200  $\mu$ L volume of LB in replicate wells ( $n = 3$  or  $6$ ) of a 96-well plate  
138 (Corning Inc., Corning, NY). For most populations, 200 PFUs were inoculated in each well. However,  
139 because of low phage survival rates at longer heat shock times, some wells received fewer PFUs (Fig S3).  
140 Across all wells, however, bacteria and phage were inoculated at a constant multiplicity of infection  
141 (MOI; ratio of phage particles to bacterial cells) of  $10^{-5}$ . Plates were incubated >12 hours at 37°C and an  
142 automated spectrophotometer (INFINITE F500 microplate reader, TECAN Schweiz AG, Männedorf,  
143 Switzerland) was used to monitor changes in the bacterial density (OD600) every 5 minutes, as  
144 described above. Growth curves were smoothed and the first local maximum optical density of the  
145 bacterial population was used as a reverse proxy for the fitness of phage (Fig S2) [33, 34] (see R script at  
146 <https://github.com/mikeblazanin/tin-omko1>). We then fit a linear model and carried out an ANOVA for  
147 peak bacterial density as a function of heat shock treatment (as a factor), phage stock, and treatment-  
148 stock interaction. Treatments which were not initially inoculated with 200 PFUs were excluded from

149 statistical analyses. Post-hoc pairwise comparisons between all levels of the heat shock treatment were  
150 performed with Tukey's Honest Significant Differences.

#### 151 Urea & salt stress survival

152 To measure the effects of urea (carbamide) and salt (NaCl) on phage stability, 10  $\mu$ L of phage stock F, G,  
153 or H was added to 990  $\mu$ L of either urea or salt solution at a defined concentration, and vortexed to mix  
154 thoroughly. For saline, these included 0M, 0.5M, 3M, 5M, and an LB control (0.17M). For urea, these  
155 included 0M, 1M, 2M, 3M, and 4M. One replicate of each of the three phage stocks was exposed to  
156 each concentration. At 45 and 90 minutes, subsamples were obtained by removing 50  $\mu$ L and  
157 immediately diluting 200-fold to terminate the stress condition. Then, the stressed samples were titered  
158 in triplicate to calculate survival following stress, with percent survival calculated relative to the control  
159 titer (for saline, LB; for urea, 0M) at 0 minutes. We then fit a generalized linear model and carried out an  
160 ANCOVA of  $\log_{10}$ (percent survival) as a function of urea or saline concentration (as a factor) and the  
161 interaction between concentration and duration. Values below the limit of detection were excluded  
162 from statistical analyses.

#### 163 Analysis

164 All analysis was carried out in R (3.6.0) using dplyr (0.8.2), figures were made using ggplot2 (3.2.0) and  
165 ggsignif (0.6.0) [35-38]. All data analysis and visualization code is available at  
166 <https://github.com/mikeblazanin/tin-omko1>

167

#### 168 **Results**

169 To estimate the tolerance of phage OMKO1 to heat stress, we measured phage particle survival over  
170 time at different temperatures. Temperature shock significantly increased phage OMKO1 decay rate (Fig  
171 1A, ANCOVA,  $F(4, 8) = 125.01$ ,  $p < 0.001$ ). At the two lowest temperatures (55°C and 60°C), there was no  
172 significant evidence of OMKO1 decay over time (Table 1). However, at 65°C there was a significant  
173 moderate signal of decay, which became more pronounced at 70°C. At 75°C and 80°C, phage particles  
174 decayed so rapidly that most measures in these environments were unobtainable (i.e., fell below the  
175 limit of detection). Abnormal plaque morphology was also observed in heat-treated phages (data not  
176 shown), suggesting possible phenotypic alteration of phage OMKO1 following heat treatment, explored  
177 further below.

178

179 **Table 1. Multiple regression shows significant phage OMKO1 decay at 65°C and higher temperatures.**

180 Parameter estimates of the rate of decay over time (slope) depending on temperature were evaluated  
181 to detect increased decay (decreased slopes) against the null hypothesis of 0 slope using one-tailed t-  
182 tests (df = 8) and a Bonferroni correction (4 tests).

| Temperature (°C) | Estimated Coefficient | t-value | Bonferroni-adjusted p-value |
|------------------|-----------------------|---------|-----------------------------|
| 55               | 0.0008                | 0.98    | 1                           |
| 60               | 0.0005                | 0.58    | 1                           |
| 65               | -0.0028               | -3.35   | 0.020                       |
| 70               | -0.0182               | -22.08  | < 0.001                     |
| 75-80            | NA                    | NA      | NA                          |

183

184 Given the observed substantial decay of phage OMKO1 induced by elevated temperatures, we next  
185 sought to observe the dynamics of heat-induced decay over longer periods of time to assess whether  
186 decay would continue as exponential or appear biphasic. As expected, we found significant decay over  
187 time at 70°C (Fig 1B, ANCOVA effect of duration,  $F(1, 20) = 519.1$ ,  $p < 0.001$ ), and the rate of decay was  
188 similar to the prior experiment [Fig 1A slope of  $\log_{10}(\text{percent})$  at 70°C = -0.0167, Fig 1B slope of  
189  $\log_{10}(\text{percent})$  of stock A = -0.0161]. We did not observe a notably biphasic decay curve. Surprisingly,  
190 biological replicates (phage stocks) had somewhat different decay dynamics, although much of this  
191 pattern was driven by a single replicate (ANCOVA effect of stock,  $F(4, 20) = 2.54$ ,  $p = 0.07$ ; ANCOVA  
192 interaction between stock and time,  $F(4, 20) = 0.95$ ,  $p = 0.45$ ).

193 Finally, we sought to test whether exposure to heat might affect the subsequent growth abilities of  
194 surviving phage particles. To do so, we took the phage particles that had been heat-shocked at 70°C for  
195 different durations of time and normalized their concentrations according to how many plaques they  
196 formed. Because of low titers, some populations after 270 and 360 minutes of heat shock could not be  
197 normalized, so those timepoints were excluded from analysis (see Fig S3 for data). Then, we measured  
198 how well these standardized phage suspensions suppressed the growth of host bacteria *P. aeruginosa*  
199 cultured for 12 hours (see Methods). As expected, bacterial densities initially increased, before peaking  
200 and declining as phages lysed bacterial cells (Fig S2). From these data, we extracted the peak density of  
201 bacterial population size as a proxy for gauging phage growth ability (fitness), where lower peak  
202 bacterial densities reflected higher fitness of tested phage populations. For comparison, we included  
203 two controls where bacteria were cultured in the absence of phage, in standard LB medium and in LB  
204 medium that was heat-shocked for 360 minutes.

205 We observed a significant effect of heat-shock exposure on the subsequent fitness of virus particles (Fig  
206 1C), as measured by peak density of the bacterial population (ANOVA,  $F(3, 15) = 14.2$ ,  $p < 0.001$ ). As  
207 expected, the presence of unshocked phage OMKO1 (0 min) reduced peak bacterial density relative to  
208 the phage-free bacterial controls, indicating that the phage negatively affected bacterial growth (Table  
209 S1). Surprisingly, a history of exposure to heat shock reduced the ability of phage particles to suppress  
210 bacterial growth, permitting higher peak bacterial densities (Tukey Honest Significant Differences among  
211 all heat stress treatments showed significant differences between unshocked control of 0 minutes and

212 all other treatments at  $p < 0.01$ , see Fig 1C). However, increasing durations of heat shock exposure did  
213 not lead to further decreases in phage fitness (Tukey HSD finds no significant differences among 5  
214 minutes through 180 minutes treatments,  $p \geq 0.69$ ). Unexpectedly, this remained true even after  
215 extremely long heat shocks, where the survival rate was very low (e.g. after 180 minutes survival was  
216  $\sim 0.01\%$ ; Fig. 1B). We noted that this increase in peak bacterial density could not be explained by the  
217 effect of heat-shocked medium alone, as heat shocked media had the opposite effect of reducing peak  
218 bacterial density (+ Ctrl Shock vs + Ctrl, two-sample t-test of unequal variance,  $t = -4.18$ ,  $df = 8.86$ ,  $p =$   
219  $0.002$ ). These results indicated that heat shock not only inactivated viral particles (Figs 1A and B), but  
220 also reduced the subsequent growth of surviving phage particles (Fig 1C).



221

222 **Figure 1. Inactivation & fitness suppression of OMKO1 by thermal stress**

223 **A.** To measure phage particle survival of heat stress at different temperatures, OMKO1 was exposed to

224 one of a range of temperatures for 5, 30, 60, or 90 minutes, then titered. Percent survival is plotted

225 relative to the titer of the 55°C treatment after 0 minutes. The dotted line denotes the limit of  
226 detection, with the timepoint where survival fell below the limit of detection plotted as an asterisk. 80°C  
227 was also tested but caused such rapid particle decay that all measures fell below the limit of detection.  
228 **B.** To measure phage particle survival of heat stress over longer periods of time, five biological replicates  
229 of phage OMKO1 were exposed to 70°C for 5, 90, 180, 270, or 360 minutes, then titered. Percent  
230 survival is plotted relative to the source stock titer. The dotted line denotes the mean limit of detection  
231 across all five batches. **C.** To determine whether phage fitness is affected by a history of heat stress  
232 exposure, 70°C heat shocked phages or unshocked control phages (0 min) were inoculated with bacteria  
233 and grown overnight while measuring bacterial density. As a metric of phage fitness, the peak bacterial  
234 density was computationally determined. Thus, higher peak bacterial densities indicated phages with  
235 lower fitness. The dotted line denotes the absence of bacterial growth. Bacteria were also grown in the  
236 absence of phage in LB media (“+ Ctrl”) or LB media that had been heat shocked for 360 mins at 70°C (“+  
237 Ctrl Shock”). Heat shock treatments that are not significantly different from each other via Tukey Honest  
238 Significant Differences are indicated by the same shared letter (a or b).

---

239

240 Next, to estimate the tolerance of phage OMKO1 to saline stress, we measured phage particle survival  
241 over time in different saline concentrations, relative to starting densities. Although there was a  
242 significant effect of saline concentration on densities over time (slope of the lines in Fig 2; ANCOVA:  $F(5,$   
243  $23) = 5.57, p = 0.002$ ), higher saline concentrations did not accelerate phage decay (Table S2). This was  
244 likely because of the unexpected increase of phage densities in some treatments, which we ascribed to  
245 sampling variation. These findings were consistent with other data collected on a single phage stock  
246 with greater sampling density, where saline had no effect on the decay rate of phage OMKO1 (Fig S4).

247



248

249 **Figure 2. Phage OMKO1 decay is not accelerated by saline concentration**

250 To measure phage particle survival of saline stress, phage OMKO1 was exposed to a range of saline  
251 concentrations then titered after 45 and 90 minutes. Percent survival is plotted relative to the titer of  
252 the LB control (0.17 M) at 0 minutes. Bold lines denote the average of the three biological replicates,  
253 with individual replicates plotted as points (horizontally offset for visualization). The mean limit of  
254 detection between the replicates is plotted as a dotted line.

---

255

256 To estimate the tolerance of phage OMKO1 to urea stress, we measured phage particle survival over  
257 time in different urea concentrations, relative to starting densities. Higher urea concentrations elevated  
258 the rate of decay of phage particles (Fig 3), although this trend was not significant after measures below  
259 the limit of detection were removed (slope of the lines in Fig 3; ANCOVA:  $F(5, 15) = 1.19$ ,  $p = 0.36$ , Table  
260 S3). In particular, within the 90-minute assay, we observed that phage survival was unaffected by urea  
261 concentrations up to 2M, while phages decayed more rapidly in 3M and 4M. These findings were  
262 consistent with data collected on a single phage stock with greater sampling density, although there  
263 urea significantly increased decay at 1M and above (Fig S5, Table S4).

264

265



266

267 **Figure 3. Degradation of phage OMKO1 under different urea concentrations.**

268 To measure phage particle survival of urea stress, phage OMKO1 was exposed to a range of urea  
269 concentrations then titered after 45 and 90 minutes. Percent survival is plotted relative to the titer of  
270 the control (0 M) at 0 minutes. Bold lines denote the average of the three biological replicates, with  
271 individual replicates plotted as points (horizontally offset for visualization). Points which fall below the  
272 limit of detection are plotted at the limit of detection for that batch as asterisks.

273

274

## 275 Discussion

276 Due to increasing interest in phage therapy to complement or replace traditional chemical antibiotics,  
277 we sought to understand the stability and response of phage particles to environmental stressors. Here,  
278 we examined how the therapeutic phage OMKO1 responded to possible degradation caused by salt,  
279 urea, and heat stressors as a model of the environmental robustness of a phage therapy candidate. We  
280 observed no measurable adverse effect of salinity on phage OMKO1 survival (Fig 2), but strong effects of  
281 both increased urea concentrations (Fig 3) and elevated temperatures (Fig 1A, B) on virus survival. In  
282 addition, we found that phage particles which survived elevated temperatures had reduced fitness, as  
283 measured by their ability to suppress the growth of susceptible bacterial cells (Fig 1C).

284

285 Exposure to high temperatures both increased the decay of phage particles and decreased the fitness of  
286 particles which remained viable. Virus particles decay approximately exponentially (Fig 1B, linear on log-  
287 linear axes), with higher temperatures increasing the rate of degradation (Fig 1A), although we have  
288 limited resolution to detect a bi-phasic decay, as observed elsewhere [26]. Intriguingly, OMKO1 particles  
289 which survive exposure to heat stress experience a drastic reduction in fitness. This effect is apparent  
290 even after only five minutes of exposure, and does not become more pronounced following longer  
291 durations of heat stress (Fig 1C). Along with the observed abnormal plaque morphology after heat  
292 shock, these results indicate a strong plastic response of phage fitness to high temperature exposure.  
293 We propose three possible explanations for this observation. The first is that the population of OMKO1  
294 particles is heterogenous in resistance to heat shock, and that stability trades off with fitness. While this  
295 sort of stability-function tradeoff is thought to be common for proteins [39, 40], this explanation is  
296 incompatible with the observation of simultaneous high survival and large decreases in fitness for two of  
297 the replicate populations (e.g. populations A and E after 5 minutes, Figs S1, S3). The second explanation  
298 is that OMKO1 particles which no longer form plaques due to heat stress may inhibit the infection of  
299 cells, possibly by competitively binding to phage receptors and blocking infection by “active” phage  
300 particles. Although this can explain improved growth of bacteria in the presence of heat-shocked  
301 phages, it cannot explain the observed changes when phages have both high survival percentages and  
302 low fitness (e.g. populations A and E after 5 minutes, Figs S1, S3). As a final explanation, we propose that  
303 high temperatures alter viral particle conformations to a lower-fitness state, an environmentally-caused  
304 damage. Thus, any exposure to heat shock alters the state and phenotype of all surviving viral particles,  
305 consistent with the observed changes in fitness following heat shock (Fig 1C). While such bistability is  
306 observed here following environmental conditions, phage particle bistability elsewhere has been  
307 previously reported to promote the evolution of novel host use [41].

308 We also observed that phage OMKO1 was deactivated by elevated urea concentrations, consistent with  
309 previously-published findings on other phages. For example, some of the earliest work published on this  
310 topic tested the survival of particles of coliphages (viruses that specifically infect *Escherichia coli*) over  
311 time in a 4.61M urea solution, observing decay anywhere from 0 to 7 orders of magnitude within 30  
312 minutes [28]. Similarly, phage T4 experienced 90% decay after one minute of exposure to 2.5M urea  
313 [29]. By comparison, phage OMKO1 decayed more slowly (~95% after 45 minutes at 4M, Fig 3),  
314 suggesting that this virus had relatively greater tolerance for elevated urea concentrations compared  
315 with the limited evidence from other published studies on phage survival.

316 In contrast to our findings with urea, our failure to find an effect of saline stress diverged from  
317 previously-published results on other phages. Phages T2, T4, T6 and  $\psi_1$  have been reported to be  
318 deactivated when they are rapidly osmotically shocked from 4M to 0M NaCl, and several phages decay  
319 in 0M NaCl, all conditions where we observed no effect [27, 30, 31]. Experimental differences may have  
320 contributed to these divergent results, including differences in the rate of dilution and thus severity of  
321 osmotic shock, or in the relatively shorter time-lengths of our experiments. Additionally, our findings  
322 may reflect some degree of underlying differences in susceptibility to osmotic shock between different  
323 phages, where OMKO1 is more tolerant of osmotic shock and saline stress than other reported phages.

324 Our results are also relevant to the understanding of how environmental stressors might affect use of  
325 phage OMKO1 in human therapy. Our experiments were generally designed to exceed the range of  
326 environmental conditions that phage particles could experience during storage or within therapy  
327 applications in the human body. For example, within the human body the concentrations of salt range  
328 from roughly 30mM in urine to 135-145 mM in blood [42], all conditions where we saw no increase in  
329 phage OMKO1 decay rate (Fig 2); similarly urea concentrations range from 2.6-6.5mM in human blood  
330 up to 325mM in human urine [43], again conditions where we observed no increase in phage decay rate  
331 (Fig 3). Human body temperatures can reach a maximum of ~40°C, while phage storage conditions could  
332 reach perhaps 50°C. We found that phage OMKO1 shows no significant decay over 90 minutes at 55°C  
333 (Fig 1A), suggesting that heat stress is only relevant over these timescales at temperatures well beyond  
334 those experienced by a therapeutic phage. This, however, does not rule out the possibility of  
335 accelerated decay at lower temperatures from factors others than heat stress. These indications of the  
336 general stability of phage OMKO1 despite possible environmental stressors are promising for its further  
337 potential uses in clinical applications.

338 Future studies on the stability of phage OMKO1 and other therapeutic phages should expand the types  
339 of examined stressors, consider interactions between multiple stressors, and begin to more deeply  
340 elucidate the nature of the observed phage particle bistability. For instance, future work could expand  
341 on the scope of this study by considering the effects of pH and electromagnetic radiation, as well as  
342 interactions among any environmental stressors or between these stressors and storage conditions [e.g.  
343 freezing, lyophilizing (freeze drying)]. Additionally, biophysical and imaging approaches could be utilized  
344 to understand the mechanistic details behind phage particle stability and conformation, like those  
345 underlying the observed changes in phage fitness after any duration of heat stress exposure. While  
346 these experiments would deepen our understanding of phage biology and stability, our current work has  
347 revealed the limits of the stability of phage OMKO1 and highlighted intriguing nonlinear responses of  
348 phages to environmental stress, confirming the need for careful characterization and storage of  
349 therapeutic phages for widespread clinical use.

350

### 351 **Acknowledgements**

352 We thank Alita Burmeister, Caroline Turner, Michael Wisner, and three anonymous reviewers for helpful  
353 feedback on the manuscript, and the support for Wai Tin Lam from the Chinese University of Hong Kong.

354

### 355 **Data Availability**

356 All data and analysis are available at <https://github.com/mikeblazanin/tin-omko1>.

357

### 358 **References**

359 1. de Kraker ME, Davey PG, Grundmann H. Mortality and hospital stay associated with resistant  
360 Staphylococcus aureus and Escherichia coli bacteremia: estimating the burden of antibiotic resistance in

- 361 Europe. PLoS medicine. 2011;8(10):e1001104. Epub 2011/10/25. doi: 10.1371/journal.pmed.1001104.  
362 PubMed PMID: 22022233; PubMed Central PMCID: PMCPMC3191157.
- 363 2. Michael CA, Dominey-Howes D, Labbate M. The antimicrobial resistance crisis: causes,  
364 consequences, and management. *Frontiers in public health*. 2014;2:145. Epub 2014/10/04. doi:  
365 10.3389/fpubh.2014.00145. PubMed PMID: 25279369; PubMed Central PMCID: PMCPMC4165128.
- 366 3. Kortright KE, Chan BK, Koff JL, Turner PE. Phage Therapy: A Renewed Approach to Combat  
367 Antibiotic-Resistant Bacteria. *Cell host & microbe*. 2019;25(2):219-32. Epub 2019/02/15. doi:  
368 10.1016/j.chom.2019.01.014. PubMed PMID: 30763536.
- 369 4. Landerkin GB, Katznelson H. Stability of antibiotics in honey and sugar syrup as affected by  
370 temperature. *Applied microbiology*. 1957;5(3):152-4. Epub 1957/05/01. PubMed PMID: 13435725;  
371 PubMed Central PMCID: PMCPMC1057279.
- 372 5. Wick WE. Influence of antibiotic stability on the results of in vitro testing procedures. *Journal of*  
373 *bacteriology*. 1964;87(5):1162-70. Epub 1964/05/01. PubMed PMID: 5874538; PubMed Central PMCID:  
374 PMCPMC277162.
- 375 6. Samara E, Moriarty TF, Decosterd LA, Richards RG, Gautier E, Wahl P. Antibiotic stability over six  
376 weeks in aqueous solution at body temperature with and without heat treatment that mimics the curing  
377 of bone cement. *Bone & joint research*. 2017;6(5):296-306. Epub 2017/05/19. doi: 10.1302/2046-  
378 3758.65.bjr-2017-0276.r1. PubMed PMID: 28515059; PubMed Central PMCID: PMCPMC5457644.
- 379 7. Svahn O, Bjorklund E. Describing sorption of pharmaceuticals to lake and river sediments, and  
380 sewage sludge from UNESCO Biosphere Reserve Kristianstads Vattenrike by chromatographic  
381 asymmetry factors and recovery measurements. *Journal of chromatography A*. 2015;1415:73-82. Epub  
382 2015/09/13. doi: 10.1016/j.chroma.2015.08.061. PubMed PMID: 26362805.
- 383 8. Theuretzbacher U. Global antibacterial resistance: The never-ending story. *Journal of global*  
384 *antimicrobial resistance*. 2013;1(2):63-9. Epub 2013/06/01. doi: 10.1016/j.jgar.2013.03.010. PubMed  
385 PMID: 27873580.
- 386 9. Tacconelli E, Carrara E, Savoldi A, Harbarth S, Mendelson M, Monnet DL, et al. Discovery,  
387 research, and development of new antibiotics: the WHO priority list of antibiotic-resistant bacteria and  
388 tuberculosis. *The Lancet Infectious Diseases*. 2018;18(3):318-27. doi: [https://doi.org/10.1016/S1473-](https://doi.org/10.1016/S1473-3099(17)30753-3)  
389 [3099\(17\)30753-3](https://doi.org/10.1016/S1473-3099(17)30753-3).
- 390 10. Fazeli H, Akbari R, Moghim S, Narimani T, Arabestani MR, Ghoddousi AR. Pseudomonas  
391 aeruginosa infections in patients, hospital means, and personnel's specimens. *J Res Med Sci*.  
392 2012;17(4):332-7. Epub 2012/12/26. PubMed PMID: 23267393; PubMed Central PMCID:  
393 PMCPMC3526125.
- 394 11. Mena KD, Gerba CP. Risk assessment of Pseudomonas aeruginosa in water. *Reviews of*  
395 *environmental contamination and toxicology*. 2009;201:71-115. Epub 2009/06/02. doi: 10.1007/978-1-  
396 4419-0032-6\_3. PubMed PMID: 19484589.
- 397 12. Remold SK, Brown CK, Farris JE, Hundley TC, Perpich JA, Purdy ME. Differential habitat use and  
398 niche partitioning by Pseudomonas species in human homes. *Microbial ecology*. 2011;62(3):505-17.  
399 Epub 2011/04/20. doi: 10.1007/s00248-011-9844-5. PubMed PMID: 21503776.
- 400 13. Slekovec C, Plantin J, Cholley P, Thouverez M, Talon D, Bertrand X, et al. Tracking down  
401 antibiotic-resistant Pseudomonas aeruginosa isolates in a wastewater network. *PLoS one*.  
402 2012;7(12):e49300-e. doi: 10.1371/journal.pone.0049300. PubMed PMID: 23284623.
- 403 14. Garau J, Gomez L. Pseudomonas aeruginosa pneumonia. *Current opinion in infectious diseases*.  
404 2003;16(2):135-43. Epub 2003/05/08. doi: 10.1097/00001432-200304000-00010. PubMed PMID:  
405 12734446.
- 406 15. Mittal R, Aggarwal S, Sharma S, Chhibber S, Harjai K. Urinary tract infections caused by  
407 Pseudomonas aeruginosa: A minireview. *Journal of Infection and Public Health*. 2009;2(3):101-11. doi:  
408 <https://doi.org/10.1016/j.jiph.2009.08.003>.

- 409 16. Aeschlimann JR. The role of multidrug efflux pumps in the antibiotic resistance of *Pseudomonas*  
410 *aeruginosa* and other gram-negative bacteria. Insights from the Society of Infectious Diseases  
411 Pharmacists. *Pharmacotherapy*. 2003;23(7):916-24. Epub 2003/07/30. doi:  
412 10.1592/phco.23.7.916.32722. PubMed PMID: 12885104.
- 413 17. Mah TF, Pitts B, Pellock B, Walker GC, Stewart PS, O'Toole GA. A genetic basis for *Pseudomonas*  
414 *aeruginosa* biofilm antibiotic resistance. *Nature*. 2003;426(6964):306-10. Epub 2003/11/25. doi:  
415 10.1038/nature02122. PubMed PMID: 14628055.
- 416 18. Walters MC, 3rd, Roe F, Bugnicourt A, Franklin MJ, Stewart PS. Contributions of antibiotic  
417 penetration, oxygen limitation, and low metabolic activity to tolerance of *Pseudomonas aeruginosa*  
418 biofilms to ciprofloxacin and tobramycin. *Antimicrobial agents and chemotherapy*. 2003;47(1):317-23.  
419 Epub 2002/12/25. PubMed PMID: 12499208; PubMed Central PMCID: PMCPMC148957.
- 420 19. Seed KD. Battling Phages: How Bacteria Defend against Viral Attack. *PLoS pathogens*.  
421 2015;11(6):e1004847. Epub 2015/06/13. doi: 10.1371/journal.ppat.1004847. PubMed PMID: 26066799;  
422 PubMed Central PMCID: PMCPMC4465916.
- 423 20. Chan BK, Siström M, Wertz JE, Kortright KE, Narayan D, Turner PE. Phage selection restores  
424 antibiotic sensitivity in MDR *Pseudomonas aeruginosa*. *Sci Rep*. 2016;6:26717. Epub 2016/05/27. doi:  
425 10.1038/srep26717. PubMed PMID: 27225966; PubMed Central PMCID: PMCPMC4880932.
- 426 21. Gurney J, Pradier L, Griffin JS, Gougat-Barbera C, Chan BK, Turner PE, et al. Phage steering of  
427 antibiotic-resistance evolution in the bacterial pathogen, *Pseudomonas aeruginosa*. *Evolution, Medicine,*  
428 *and Public Health*. 2020;2020(1):148-57. doi: 10.1093/emph/eoaa026.
- 429 22. Chan BK, Turner PE, Kim S, Mojibian HR, Elefteriades JA, Narayan D. Phage treatment of an  
430 aortic graft infected with *Pseudomonas aeruginosa*. *Evol Med Public Health*. 2018;2018(1):60-6. Epub  
431 2018/03/29. doi: 10.1093/emph/eoy005. PubMed PMID: 29588855; PubMed Central PMCID:  
432 PMCPMC5842392.
- 433 23. Pollard EC, Solosko W. The thermal inactivation of T4 and lambda bacteriophage. *Biophysical*  
434 *journal*. 1971;11(1):66-74. doi: 10.1016/S0006-3495(71)86195-7. PubMed PMID: 5539000.
- 435 24. Goldhill DH, Turner PE. The evolution of life history trade-offs in viruses. *Current opinion in*  
436 *virology*. 2014;8:79-84. Epub 2014/08/05. doi: 10.1016/j.coviro.2014.07.005. PubMed PMID: 25087040.
- 437 25. Jonczyk E, Klak M, Miedzybrodzki R, Gorski A. The influence of external factors on  
438 bacteriophages--review. *Folia microbiologica*. 2011;56(3):191-200. Epub 2011/06/01. doi:  
439 10.1007/s12223-011-0039-8. PubMed PMID: 21625877; PubMed Central PMCID: PMCPMC3131515.
- 440 26. Bleichrodt JF, Blok J, Berends-Van Abkoude ER. Thermal inactivation of bacteriophage phi X174  
441 and two of its mutants. *Virology*. 1968;36(3):343-55. Epub 1968/11/01. doi: 10.1016/0042-  
442 6822(68)90160-8. PubMed PMID: 5722182.
- 443 27. Anderson TF. The reactions of bacterial viruses with their host cells. *The Botanical Review*.  
444 1949;15(7):464-505.
- 445 28. Burnet FM. The Classification of Dysentery-Coli Bacteriophages. III. A Correlation of the  
446 Serological Classification with Certain Biochemical Tests. *Journal of Pathology and Bacteriology*.  
447 1933;37:179-84.
- 448 29. Sato GH. Activation of bacteriophage by urea. *Science (New York, NY)*. 1956;123(3203):891-2.  
449 Epub 1956/05/18. doi: 10.1126/science.123.3203.891. PubMed PMID: 13324109.
- 450 30. Seaman PF, Day MJ. Isolation and characterization of a bacteriophage with an unusually large  
451 genome from the Great Salt Plains National Wildlife Refuge, Oklahoma, USA. *FEMS microbiology*  
452 *ecology*. 2007;60(1):1-13. Epub 2007/01/26. doi: 10.1111/j.1574-6941.2006.00277.x. PubMed PMID:  
453 17250749.
- 454 31. Whitman PA, Marshall RT. Characterization of two psychrophilic *Pseudomonas* bacteriophages  
455 isolated from ground beef. *Applied microbiology*. 1971;22(3):463-8. Epub 1971/09/01. PubMed PMID:  
456 4107517; PubMed Central PMCID: PMCPMC376334.

- 457 32. Dulbecco R, Vogt M. Some problems of animal virology as studied by the plaque technique. Cold  
458 Spring Harbor symposia on quantitative biology. 1953;18:273-9. Epub 1953/01/01. doi:  
459 10.1101/sqb.1953.018.01.039. PubMed PMID: 13168995.
- 460 33. Turner PE, Draghi JA, Wilpiseski R. High-throughput analysis of growth differences among  
461 phage strains. Journal of microbiological methods. 2012;88(1):117-21. Epub 2011/11/22. doi:  
462 10.1016/j.mimet.2011.10.020. PubMed PMID: 22101310.
- 463 34. Singhal S, Turner PE. Effects of historical co-infection on host shift abilities of exploitative and  
464 competitive viruses. Evolution. 2021. doi: <https://doi.org/10.1111/evo.14263>.
- 465 35. Team RC. R: A Language and Environment for Statistical Computing [Manual]. Vienna, Austria: R  
466 Foundation for Statistical Computing; 2019. Available from: <https://www.r-project.org/>.
- 467 36. Wickham H, François R, Henry L, Müller K. dplyr: A Grammar of Data Manipulation [Manual].  
468 2019. Available from: <https://cran.r-project.org/package=dplyr>.
- 469 37. Wickham H. ggplot2: Elegant Graphics for Data Analysis: Springer-Verlag New York; 2016.
- 470 38. Ahlmann-Eltze C. ggsignif: Significance Brackets for 'ggplot2' [Manual]. 2019. Available from:  
471 <https://cran.r-project.org/package=ggsignif>.
- 472 39. Beadle BM, Shoichet BK. Structural bases of stability-function tradeoffs in enzymes. Journal of  
473 molecular biology. 2002;321(2):285-96. Epub 2002/07/30. doi: 10.1016/s0022-2836(02)00599-5.  
474 PubMed PMID: 12144785.
- 475 40. Studer RA, Christin PA, Williams MA, Orengo CA. Stability-activity tradeoffs constrain the  
476 adaptive evolution of RubisCO. Proceedings of the National Academy of Sciences of the United States of  
477 America. 2014;111(6):2223-8. Epub 2014/01/29. doi: 10.1073/pnas.1310811111. PubMed PMID:  
478 24469821; PubMed Central PMCID: PMC3926066.
- 479 41. Petrie KL, Palmer ND, Johnson DT, Medina SJ, Yan SJ, Li V, et al. Destabilizing mutations encode  
480 nongenetic variation that drives evolutionary innovation. Science (New York, NY). 2018;359(6383):1542-  
481 5. Epub 2018/03/31. doi: 10.1126/science.aar1954. PubMed PMID: 29599247.
- 482 42. Reynolds RM, Padfield PL, Seckl JR. Disorders of sodium balance. BMJ (Clinical research ed).  
483 2006;332(7543):702-5. doi: 10.1136/bmj.332.7543.702. PubMed PMID: 16565125.
- 484 43. Liu L, Mo H, Wei S, Raftery D. Quantitative analysis of urea in human urine and serum by 1H  
485 nuclear magnetic resonance. The Analyst. 2012;137(3):595-600. Epub 12/16. doi: 10.1039/c2an15780b.  
486 PubMed PMID: 22179722.

487

488

489 **Supplemental Material**

490 **Statistical Tables for Main Text Figures**

491 **Table S1. Phage OMKO1 suppression of peak bacterial density is robust to presence/absence of heat-**  
 492 **shocked media in controls.** Two-sample one-tailed unequal variance t-tests between both positive  
 493 controls (+ Ctrl is bacteria alone, + Ctrl Shock is bacteria alone in media shocked at 70°C for 360 mins)  
 494 and each of the 0 minutes heat shock populations show Bonferroni-corrected (10 tests) significant  
 495 reductions in peak bacterial growth.

| Contrast                      | Estimated Difference | df   | t-value | Bonferroni-adjusted p-value |
|-------------------------------|----------------------|------|---------|-----------------------------|
| + Ctrl – 0 mins Phage A       | -1.24                | 5.35 | -106.6  | <0.001                      |
| + Ctrl – 0 mins Phage B       | -0.99                | 6.38 | -65.2   | <0.001                      |
| + Ctrl – 0 mins Phage C       | -1.26                | 5.77 | -105.6  | <0.001                      |
| + Ctrl – 0 mins Phage D       | -1.27                | 5.24 | -109.2  | <0.001                      |
| + Ctrl – 0 mins Phage E       | -1.25                | 6.29 | -101.8  | <0.001                      |
| + Ctrl Shock – 0 mins Phage A | -1.16                | 5.17 | -68.9   | <0.001                      |
| + Ctrl Shock – 0 mins Phage B | -0.90                | 6.98 | -46.6   | <0.001                      |
| + Ctrl Shock – 0 mins Phage C | -1.18                | 5.38 | -69.1   | <0.001                      |
| + Ctrl Shock – 0 mins Phage D | -1.18                | 5.11 | -70.5   | <0.001                      |
| + Ctrl Shock – 0 mins Phage E | -1.17                | 5.68 | -67.7   | <0.001                      |

496

497 **Table S2. Multiple regression shows saline concentration does not accelerate phage decay rate.**  
 498 Parameter estimates of the rate of decay over time (slope) depending on saline concentration were  
 499 evaluated to detect increased decay (decreased slopes) against the null hypothesis of 0 slope using one-  
 500 tailed t-tests (df = 23) and a Bonferroni correction (5 tests).

| Saline Concentration (M) | Estimated Coefficient | t-value | Bonferroni-adjusted p-value |
|--------------------------|-----------------------|---------|-----------------------------|
| 0                        | 0.013                 | 4.41    | 1                           |
| LB (0.17)                | 0.0029                | 1.90    | 1                           |
| 0.5                      | 0.0059                | 1.96    | 1                           |
| 3                        | 0.0029                | 0.95    | 1                           |
| 5                        | 0.00090               | 0.30    | 1                           |

501

502

503 **Table S3. Multiple regression shows nonsignificant acceleration of OMKO1 decay by urea.** Parameter  
 504 estimates of the rate of decay over time (slope) depending on urea concentration were evaluated to  
 505 detect increased decay (decreased slopes) against the null hypothesis of 0 slope using one-tailed t-tests  
 506 (df = 15) and a Bonferroni correction (5 tests). Note that all measures below the limit of detection were  
 507 excluded from analysis, limiting the power especially at 3M and 4M.

| Urea Concentration (M) | Estimated Coefficient | t-value | Bonferroni-adjusted p-value |
|------------------------|-----------------------|---------|-----------------------------|
| 0                      | 0.0014                | 0.58    | 1                           |
| 1                      | -0.0020               | -0.42   | 1                           |
| 2                      | -0.0020               | -0.42   | 1                           |
| 3                      | -0.0093               | -1.13   | 0.69                        |
| 4                      | -0.017                | -2.00   | 0.16                        |

508

509 **Supplemental Methods & Results**



510 **Figure S1. Inactivation of OMKO1 by 70°C thermal stress.** To measure phage particle survival of heat  
 511 stress over longer periods of time, five biological replicate stocks of phage OMKO1 were exposed to  
 512 70°C for 5, 90, 180, 270, or 360 minutes, then titered. Percent survival is plotted relative to the source  
 513 stock titer. The dotted line denotes the mean limit of detection across all five batches. This plot shows  
 514 the same data as Fig 1B, now with phage stock information shown. The gray line denotes the overall  
 515 average percent survival, as plotted in Fig 1B.

517



518

519 **Figure S2. Bacterial growth curves in presence of post-heat shock normalized phages.** Five different  
520 phage OMKO1 stocks were exposed to heat stress at 70°C for variable amounts of time, then normalized  
521 to have the same number of plaque-forming-units per volume. Bacteria and phages were inoculated  
522 into triplicate wells at constant MOI and the density of bacteria over time is plotted.

---

523

524 In the main text, we report the results of growth curve experiments where post-heat stress phage  
525 populations were normalized to a known concentration and grown with bacterial cells (Fig 1C). Because  
526 of low survival, at 270 and 360 minutes some stocks could not be normalized, so those timepoints were  
527 excluded from analysis and visualization. Here we present all the growth curve data, including  
528 combinations which were not inoculated with 200 pfu and  $2 \times 10^7$  cfu (Fig S3).



529

530 **Figure S3. Fitness suppression of OMKO1 by thermal stress across all tested conditions.** To determine  
531 whether phage growth was altered by exposure to heat stress among surviving phage particles, heat  
532 shocked phage particles (from Fig 1B) were inoculated with bacteria and grown overnight with repeated  
533 measurements of bacterial density. The height of the peak bacterial density was computationally  
534 determined and is plotted. Thus, this peak height is a reverse proxy for phage fitness. Error bars denote  
535 95% confidence intervals among replicate wells. Positive control bacteria were grown in the absence of  
536 phage in LB media (“+ Ctrl”) or LB media that had been heat shocked for 360 mins at 70°C (“+ Ctrl  
537 Shock”), while negative control wells contained only media. Note that, due to low survival after long  
538 durations of heat shock, some growth curves were initially inoculated with reduced numbers of bacteria  
539 and phage (holding MOI constant), confounding observed differences in peak bacterial density.

540

541 In addition to the triplicate measures of the effect of saline and urea stress on phage stability reported  
542 in the main text, we also carried out measures of their effects on a single stock with greater sampling  
543 over time and a greater range of concentrations.

544 To measure these effects, 10  $\mu$ L of phage stock A was added to 1 mL of either urea or salt solution at a  
545 defined concentration, and vortexed to mix thoroughly. After a specified time, 50  $\mu$ L were removed and  
546 immediately diluted 200-fold to terminate the stress condition. Then, the stressed samples were titered  
547 to calculate survival following stress. Controls (LB with 0.17M saline for saline stress, 0M for urea stress)  
548 were titered singly, while non-controls were titered in triplicate. We then fit a generalized linear model  
549 and carried out an ANCOVA of  $\log_{10}(\text{percent survival})$  as a function of concentration (as a factor) and the

550 interaction between concentration and time. Values below the limit of detection and treatments that  
551 had fewer than 3 points above the limit of detection were excluded from statistical analyses and plots.

552 For salt stress, we exposed samples of phage OMKO1 to seven different NaCl concentrations ranging  
553 from 0M to 5M saline, including LB (0.17M saline) as a control. In each concentration treatment,  
554 subsamples were obtained at 5, 30, 60, and 90 minutes. We then measured the number of viable phage  
555 particles over time, and compared those densities to the density of phages at 5 minutes in the control to  
556 calculate percent survival. Saline concentration did not significantly alter the rate of particle decay over  
557 time (slope of the lines in Fig S4; ANCOVA:  $F(8, 16) = 0.93$ ,  $p = 0.52$ ).



558

559 **Figure S4. Phage OMKO1 stability is unaffected by saline concentration.** To measure phage particle  
560 survival of saline stress, phage OMKO1 was exposed to a range of salt concentrations then titered over  
561 time. Mean percent survival was calculated and is plotted relative to the titer of the LB control (0.17M  
562 saline) at 5-minutes. The dashed line denotes 100% survival, while the dotted line denotes the limit of  
563 detection.

564

565

566 For urea stress, we exposed samples of phage OMKO1 to eleven different urea concentrations ranging  
567 from 0M to 10M, including 0M as a control. In each concentration treatment, subsamples were obtained  
568 at 5, 30, 60, and 90 minutes. We then measured the number of viable phage particles over time, and  
569 compared those densities to the density of phages at 5 minutes in the control to calculate percent  
570 survival. Higher urea concentrations significantly increased the rate of decay of phage particles (slope of  
571 the lines in Fig S5; ANCOVA:  $F(11, 12) = 174.4$ ,  $p < 0.001$ ). In particular, we observe significantly  
572 accelerated decay in all concentrations of Urea greater than 0M ( $p \leq 0.01$ , Table S4), with decay so rapid  
573 in concentrations of 6M and above that most measures of phage density in these treatments fell below  
574 the limit of detection.



575

576 **Figure S5. Urea accelerates decay of phage OMKO1.** To measure phage particle survival of urea stress,  
577 phage OMKO1 was exposed to a range of urea concentrations then titered over time. Mean percent  
578 survival was calculated and is plotted relative to the titer of the control (0M) at 0 minutes. The dashed  
579 line denotes 100% survival, the dotted line denotes the limit of detection, and asterisks denote  
580 observations that fell below that limit. Concentrations 7M through 10M were tested but caused such  
581 rapid particle decay that all measures fell below the limit of detection, and are not plotted.

582

583

584 **Table S4. Multiple regression shows significant acceleration of OMKO1 decay by urea.** Parameter  
585 estimates of the rate of decay over time (slope) depending on urea concentration were evaluated to  
586 detect increased decay (decreased slopes) against the null hypothesis of 0 slope using one-tailed t-tests  
587 (df = 12) and a Bonferroni correction (6 tests). Note that treatments with 6M through 10M urea were  
588 excluded from this analysis since they did not have at least three values above the limit of detection

| Urea Concentration (M) | Estimated Coefficient | t-value | Bonferroni-adjusted p-value |
|------------------------|-----------------------|---------|-----------------------------|
| 0                      | 0.0014                | 2.56    | 1                           |
| 1                      | -0.0023               | -3.64   | 0.01                        |
| 2                      | -0.0020               | -3.08   | 0.002                       |
| 3                      | -0.0052               | -8.26   | < 0.001                     |
| 4                      | -0.0087               | -13.7   | < 0.001                     |
| 5                      | -0.23                 | -22.0   | < 0.001                     |

589
